# Supplementary material
Source: publisher figshare collection journal article supplement (https://sage.figshare.com/ndownloader/files/15543218)
Supplement: Supplementary file 1 [file 15543218]

## **Supplementary Material 1: Assessment of risk of bias**

### **1. Child selection**

#### *Cohort and cross-sectional studies*

Adequate: if children recruited were representative of the entire population (entire source population, unselected sample of consecutive children, or a random sample).

Inadequate: convenience sampling (arbitrary recruitment or non-consecutive recruitment) or when selection was not random or unreported.

#### *Case-control studies*

Adequate: cases and controls recruited from the same population.

Inadequate: cases and controls recruited from different source populations or unreported.

### **2. Assessment of outcome (cerebral palsy or not)**

Adequate: ascertainment of cerebral palsy by cerebral palsy register or specific assessment by appropriately qualified personnel.

Inadequate: ascertainment of cerebral palsy by personal or telephone interview, self-administered questionnaire, medical records or method unreported.

### **3. Assessment of outcome (congenital anomalies or not)**

Adequate: ascertainment of congenital anomalies by congenital anomalies register, where register accepts notification for at least one year after birth or specific examination of child (age one year or above) for congenital anomalies by an appropriately qualified person.

Inadequate: ascertainment of congenital anomalies by personal or telephone interview, self-administered questionnaire, medical records, cerebral palsy register only and/or method unreported.

### **4. Missing data**

Adequate: if congenital anomaly missing data  $\leq 10\%$ .

Inadequate: if congenital anomaly missing data  $> 10\%$  or missing data not reported.

Not applicable: linkage with congenital anomaly register.

### **5. Number of observations on which conclusions are made**

Adequate: a minimum of 100 cases of cerebral palsy with a congenital anomaly.

Inadequate: less than 100 cases cerebral palsy with a congenital anomaly.

## Supplementary Material 2: Common cerebral anomalies in children with cerebral palsy

| Anomaly (ICD-10-BPA)                      | Garne et al, 2008 <sup>5</sup> |      | Pharaoh et al, 2007 <sup>14</sup> |      | Rankin et al, 2010 <sup>6</sup> |      | Croen et al, 2001 <sup>16 a</sup><br>(moderate-severe CP only) |      | Jystad et al, 2017 <sup>15</sup><br>(singletons ≥ 34 weeks gestation only) |      |
|-------------------------------------------|--------------------------------|------|-----------------------------------|------|---------------------------------|------|----------------------------------------------------------------|------|----------------------------------------------------------------------------|------|
|                                           | n                              | % CP | n                                 | % CP | n                               | % CP | n                                                              | % CP | n                                                                          | % CP |
| Microcephaly <sup>b</sup> (Q02)           | 102                            | 2.2  | 40                                | 1.8  | 26                              | 2.4  | 12                                                             | 6.3  | 11                                                                         | 1.6  |
| Hydrocephaly, Dandy Walker (Q03)          | 74                             | 1.6  | 29                                | 1.3  | 17                              | 2.2  | 4                                                              | 2.1  | 34                                                                         | 5.0  |
| Corpus callosum anomalies (Q04.0)         | 13                             | 0.3  | NR                                |      | 10                              | 0.9  | 0                                                              | 0    | 15                                                                         | 2.2  |
| Holoprosencephaly (Q04.2)                 | NR                             |      | NR                                |      | 2                               | 0.2  | 2                                                              | 1.0  | 3                                                                          | 0.4  |
| Other reduction deformities (Q04.3)       | 72                             | 1.6  | NR                                |      | 16                              | 1.5  | 0                                                              | 0    | NR                                                                         |      |
| Septo-optic dysplasia (Q04.4)             | NR                             |      | NR                                |      | NR                              |      | 1                                                              | 0.5  | NR                                                                         |      |
| Cerebral cysts, schizencephaly (Q04.6)    | 39                             | 0.9  | NR                                |      | 6                               | 0.5  | 4                                                              | 2.1  | 15                                                                         | 2.2  |
| Other specified, unspecified (Q04.8-9)    | 94                             | 2.1  | NR                                |      | 10                              | 0.9  | 2                                                              | 1.0  | 45                                                                         | 6.6  |
| Associated with cerebral-related syndrome | NR                             |      | NR                                |      | 10                              | 0.9  | 2                                                              | 1.0  | NR                                                                         |      |
| Total CP cases                            | 4584                           |      | 2253                              |      | 1104                            |      | 192                                                            |      | 685                                                                        |      |

NR, not reported.

<sup>a</sup> Cases may be included in more than one category (4 cases had multiple cerebral anomalies).<sup>16</sup>

<sup>b</sup> Microcephaly definitions varied between studies: head circumference more than 2 standard deviations below average at birth;<sup>6</sup> head circumference more than 3 standard deviations below the mean;<sup>15</sup> microcephaly noted antenatally or at the time of birth/postnatal microcephaly excluded;<sup>5,14</sup> not defined.<sup>16</sup>

### Supplementary Material 3: Common non-cerebral anomalies in children with cerebral palsy

| Anomaly (ICD-10-BPA system)                                                                             | Garne et al, 2008 <sup>5</sup> |      | Pharaoh et al, 2007 <sup>14 a, b</sup> |      | Rankin et al, 2010 <sup>6</sup> |      | Self et al, 2012 <sup>13 a</sup> |      | Croen et al, 2001 <sup>16 a</sup><br>(moderate-severe CP only) |      | Jystad et al, 2017 <sup>15</sup><br>(singletons ≥ 34 weeks gestation only) |      |
|---------------------------------------------------------------------------------------------------------|--------------------------------|------|----------------------------------------|------|---------------------------------|------|----------------------------------|------|----------------------------------------------------------------|------|----------------------------------------------------------------------------|------|
|                                                                                                         | n                              | % CP | n                                      | % CP | n                               | % CP | n                                | % CP | n                                                              | % CP | n                                                                          | % CP |
| Non-cerebral anomalies only (2.1 – 15.8% of children with pre/perinatally acquired CP)                  |                                |      |                                        |      |                                 |      |                                  |      |                                                                |      |                                                                            |      |
| Circulatory system                                                                                      | 30                             | 0.7  | NR                                     |      | 21                              | 1.9  | 23                               | 9.5  | 2                                                              | 1.0  | 18                                                                         | 2.6  |
| Musculoskeletal system                                                                                  | 25                             | 0.5  | NR                                     |      | 9                               | 0.8  | 9                                | 3.7  | 2                                                              | 1.0  | 6                                                                          | 0.9  |
| Genitourinary system                                                                                    | 9                              | 0.2  | NR                                     |      | 12                              | 1.1  | 6                                | 2.5  | 2                                                              | 1.0  | 4                                                                          | 0.6  |
| Digestive system                                                                                        | 24                             | 0.5  | NR                                     |      | 3                               | 0.3  | 5                                | 2.1  | 1                                                              | 0.5  | 2                                                                          | 0.3  |
| Eye, ear, face and neck                                                                                 | 5                              | 0.1  | NR                                     |      | 5                               | 0.5  | 2                                | 0.8  | 1                                                              | 0.5  | 2                                                                          | 0.3  |
| Respiratory system                                                                                      | 1                              | 0.0  | NR                                     |      | 2                               | 0.2  | 0                                | 0    | 0                                                              | 0    | 1                                                                          | 0.1  |
| Other and unspecified                                                                                   | 2                              | 0.0  | NR                                     |      | NR                              | 0    | 0                                | 0    | 2                                                              | 1.0  | 13 <sup>c</sup>                                                            | 1.9  |
| Multiple                                                                                                | 1                              | 0.0  | NR                                     |      | 1                               | 0.0  | 8                                | 3.3  | 1                                                              | 0.5  | NR                                                                         |      |
| Non-cerebral with or without cerebral anomaly (2.4 – 9.9% of children with pre/perinatally acquired CP) |                                |      |                                        |      |                                 |      |                                  |      |                                                                |      |                                                                            |      |
| Circulatory system                                                                                      | 31                             | 0.7  | 52                                     | 2.3  | NR                              |      | NR                               |      | 4                                                              | 2.1  | 23                                                                         | 3.4  |
| Musculoskeletal system                                                                                  | 26                             | 0.6  | 58                                     | 2.6  | NR                              |      | NR                               |      | 4                                                              | 2.1  | 7                                                                          | 1.0  |
| Genitourinary system                                                                                    | 10                             | 0.2  | NR                                     |      | NR                              |      | NR                               |      | 2                                                              | 1.0  | 7                                                                          | 1.0  |
| Digestive system                                                                                        | 26                             | 0.6  | 22                                     | 1.0  | NR                              |      | NR                               |      | 1                                                              | 0.5  | 7                                                                          | 1.0  |
| Eye, ear, face and neck                                                                                 | 8                              | 0.2  | 8                                      | 0.4  | NR                              |      | NR                               |      | 3                                                              | 1.6  | 5                                                                          | 0.7  |
| Respiratory system                                                                                      | 1                              | 0.0  | NR                                     |      | NR                              |      | NR                               |      | 0                                                              | 0    | 1                                                                          | 0.1  |
| Other and unspecified                                                                                   | 6                              | 0.1  | NR                                     |      | NR                              |      | NR                               |      | 4                                                              | 2.1  | 14 <sup>c</sup>                                                            | 2.0  |
| Multiple                                                                                                | 3                              | 0.1  | NR                                     |      | NR                              |      | NR                               |      | 3                                                              | 1.6  | NR                                                                         |      |
| Total CP cases                                                                                          | 4584                           |      | 2253                                   |      | 1104                            |      | 241                              |      | 192                                                            |      | 685                                                                        |      |

NR, Not reported.

<sup>a</sup> Cases may be included in more than one category; multiple anomalies is not a distinct category.

<sup>b</sup> Selected anomalies only reported in study: Musculoskeletal system includes congenital deformities of hip (Q65) and feet (Q66) only; Eye, ear, face and neck category includes eye (Q11-Q14) only; Digestive system includes cleft lip/palate (Q35-Q37), oesophagus (Q39) and small/large intestine (Q41, Q42) only.

<sup>c</sup> Includes 9 cases with a non-cerebral syndrome.
